# Supplementary material
Source: publisher site journal article supplement (https://www.spandidos-publications.com/6235/downloadSupplementary)
Supplement: Supplementary file 1 [file downloadSupplementary]

## Sheet: Sheet1
Table SI. Clinical and pathological characteristics of low-grade glioma samples between training and testing set and testing sets.
Covariates	Total	Test	Train	P-value
Age				0.5796
<=65	449(93.74%)	226(94.56%)	223(92.92%)
>65	30(6.26%)	13(5.44%)	17(7.08%)
Sex				0.6167
Female	216(45.09%)	111(46.44%)	105(43.75%)
Male	263(54.91%)	128(53.56%)	135(56.25%)
Grade				0.36
GII	231(48.23%)	110(46.03%)	121(50.42%)
GIII	247(51.57%)	129(53.97%)	118(49.17%)
unknown	1(0.21%)	0(0%)	1(0.42%)
